# Supplementary material for: Resistance Modulation of Individual and Polymicrobial Culture of S. aureus and E. coli through Nanoparticle-Coupled Antibiotics
Source: MDPI journal article supplement (doi:10.3390/biomedicines11112988), 2023-11-07
Supplement: s1 [file s1]

**Table S1.** Comparative zones of inhibition (mm) produced by bacteria against different antibiotics.

| <b>Antibiotic</b> | <b><i>E. coli</i></b>      | <b><i>S. aureus</i></b>    | <b>Mixed Culture (<i>E. coli</i> + <i>S. aureus</i>)</b> |
|-------------------|----------------------------|----------------------------|----------------------------------------------------------|
| Imipenem          | 16.33 ± 1.528 <sup>a</sup> | 21.00 ± 1.00 <sup>ab</sup> | 23.0 ± 3.00 <sup>b</sup>                                 |
| Amikacin          | 11.00 ± 1.00 <sup>a</sup>  | 15.66 ± 1.528 <sup>b</sup> | 9.33 ± 1.52 <sup>b</sup>                                 |
| Oxytetracycline   | 10.00 ± 1.00 <sup>a</sup>  | 12.67 ± 2.08 <sup>ab</sup> | 8.33 ± 1.52 <sup>b</sup>                                 |
| Ampicillin        | 14.33 ± 1.52 <sup>a</sup>  | 12.67 ± 2.08 <sup>b</sup>  | 20.33 ± 1.52 <sup>b</sup>                                |
| Gentamicin        | 22.67 ± 2.52 <sup>a</sup>  | 33.67 ± 16.4 <sup>a</sup>  | 10.33 ± 1.52 <sup>b</sup>                                |
| Erythromycin      | 5.66 ± 1.52 <sup>a</sup>   | 5.00 ± 1.00 <sup>a</sup>   | 0.00 ± 0.00 <sup>b</sup>                                 |
| Ciprofloxacin     | 10.00 ± 2.00 <sup>a</sup>  | 17.00 ± 2.65 <sup>b</sup>  | 5.00 ± 1.00 <sup>b</sup>                                 |
| Penicillin        | 17.67 ± 2.52 <sup>a</sup>  | 19.33 ± 4.04 <sup>ab</sup> | 11.33 ± 1.52 <sup>b</sup>                                |

Different superscripts within a row indicate a significant difference ( $p < 0.05$ ).
